# Supplementary material for: Human Alpha-1-Antitrypsin (hAAT) therapy reduces renal dysfunction and acute tubular necrosis in a murine model of bilateral kidney ischemia-reperfusion injury
Source: PubMed Central journal article supplement (PMC5325207; doi:10.1371/journal.pone.0168981), 2017-02-24
Supplement: pone.0168981.s001.pdf [file pone.0168981.s001.pdf]

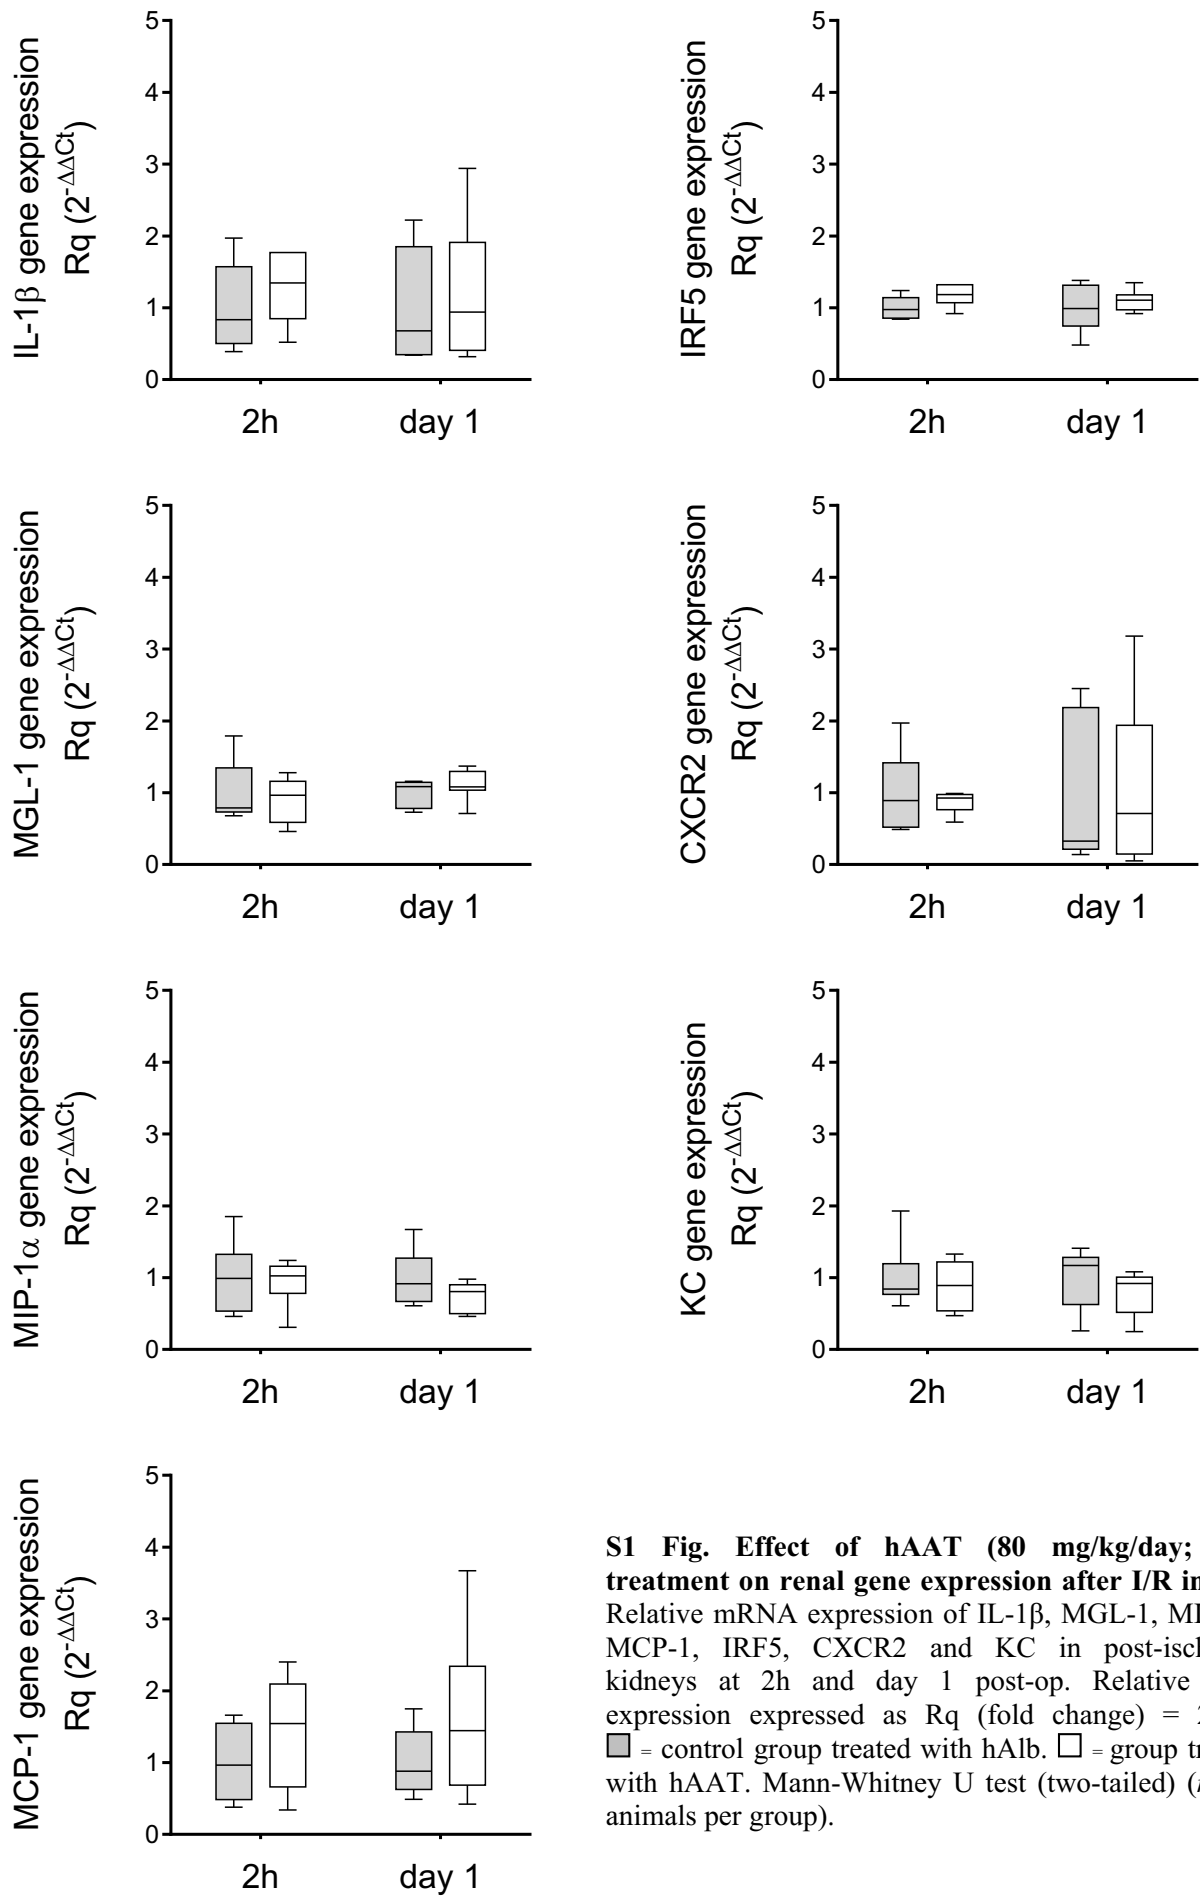

**S1 Fig. Effect of hAAT (80 mg/kg/day; i.p.) treatment on renal gene expression after I/R injury.** Relative mRNA expression of IL-1 $\beta$ , MGL-1, MIP-1 $\alpha$ , MCP-1, IRF5, CXCR2 and KC in post-ischemic kidneys at 2h and day 1 post-op. Relative gene expression expressed as Rq (fold change) =  $2^{-\Delta\Delta C_t}$ .  $\blacksquare$  = control group treated with hAlb.  $\square$  = group treated with hAAT. Mann-Whitney U test (two-tailed) ( $n=6-8$  animals per group).
