# Supplementary material for: Human Alpha-1-Antitrypsin (hAAT) therapy reduces renal dysfunction and acute tubular necrosis in a murine model of bilateral kidney ischemia-reperfusion injury
Source: PubMed Central journal article supplement (PMC5325207; doi:10.1371/journal.pone.0168981), 2017-02-24
Supplement: pone.0168981.s002.pdf [file pone.0168981.s002.pdf]

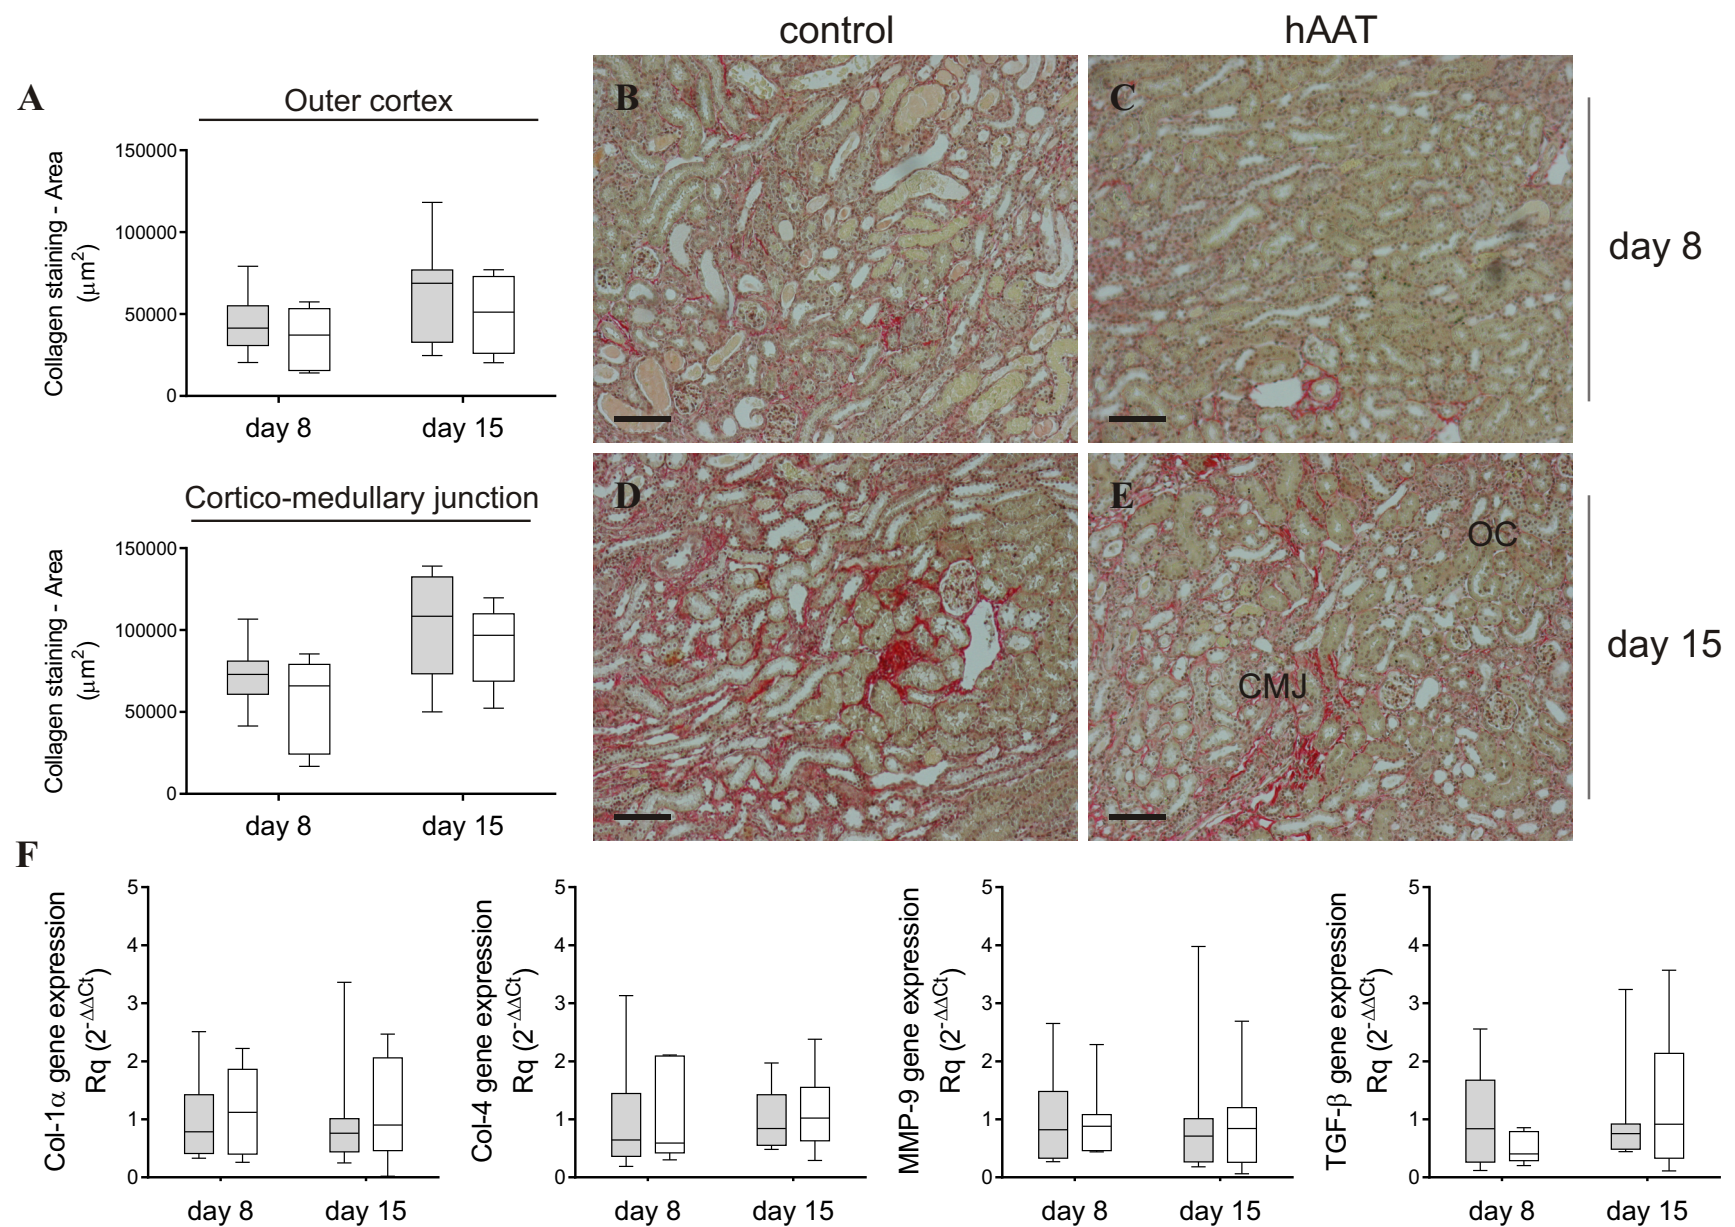

**S2 Fig. Effect of hAAT (80 mg/kg/day; i.p.) treatment on kidney fibrosis after I/R injury (IRI).** **A.** Score of fibrotic area in post-ischemic kidneys at day 8 and 15 post-op. Quantification of collagen-stained area ( $\mu\text{m}^2$ ) was performed in non-overlapping fields ( $\times 200$  magnification) throughout 2 different regions of the kidney using the image software KS 400. Two-way analysis of variance (ANOVA) followed by *Bonferroni* post-test. **B-E.** Picro-Sirius Red-stained frontal sections of mouse kidney. **B, D** representative images of ischemic kidney of a control mouse at different time-points after IRI. **C, E** representative images of ischemic kidney of a mouse treated with hAAT at different time-points after IRI. OC=outer cortex; CMJ=cortico-medullary junction. Scale bar = 100  $\mu\text{m}$  (original magnification  $\times 100$ ). **F.** Relative mRNA expression of col-1 $\alpha$ , col-4, MMP-9 and TGF- $\beta$  in post-ischemic kidneys at day 8 and 15 post-op. Relative gene expression expressed as Rq (fold change) =  $2^{-\Delta\Delta\text{Ct}}$ .  $\blacksquare$  = control group treated with hAlb.  $\square$  = group treated with hAAT. Mann-Whitney U test (two-tailed) ( $n=6-8$  animals per group).
