# Supplementary material for: Human Alpha-1-Antitrypsin (hAAT) therapy reduces renal dysfunction and acute tubular necrosis in a murine model of bilateral kidney ischemia-reperfusion injury
Source: PubMed Central journal article supplement (PMC5325207; doi:10.1371/journal.pone.0168981), 2017-02-24
Supplement: pone.0168981.s003.pdf [file pone.0168981.s003.pdf]

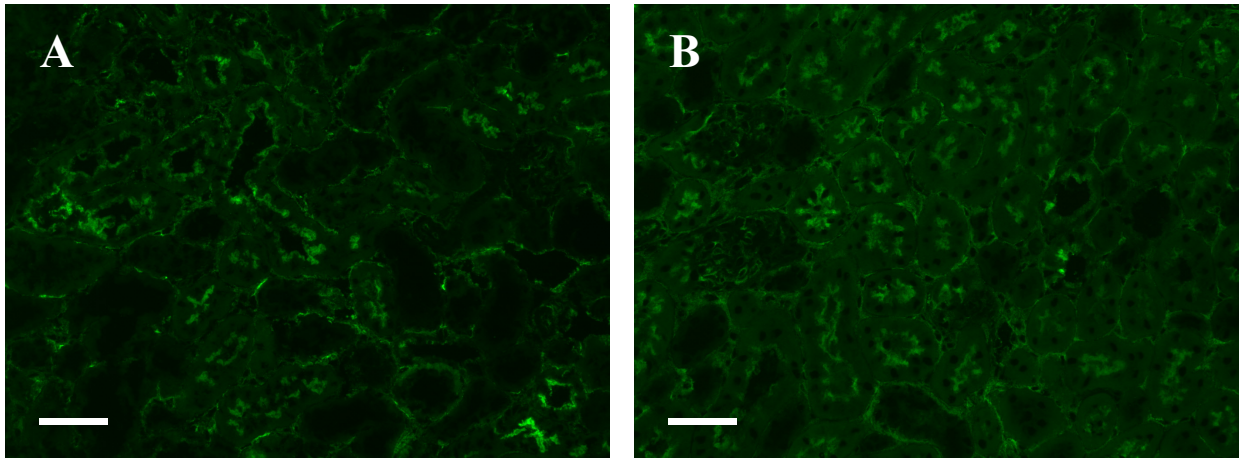

**S3 Fig. Effect of hAAT (80 mg/kg/day; i.p.) treatment on protein iCAM-1 expression in post-ischemic kidneys during the early phase of I/R injury.** Kidney sections were stained with a CD54 monoclonal anti-iCAM-1 antibody (eBioscience, dilution 1:75). **A.** Representative image of ischemic control mouse kidney. **B.** Representative image of ischemic mouse kidney treated with hAAT. Scale bar = 50  $\mu\text{m}$  (original magnification  $\times 200$ ; dark green = autofluorescence of the tubuli; bright green = iCAM-1 protein expression).
